# Supplementary material
Source: PubMed Central journal article supplement (PMC4013500)
Supplement: NIHMS559356-supplement-000259_-_Supplemental_Material.pdf [file NIHMS559356-supplement-000259_-_Supplemental_Material.pdf]

## SUPPLEMENTAL MATERIAL

Supplemental methods

Table S1. Abnormal R-R intervals in control and *Pitx2* CKO mice.

Table S2. Mice tested by telemetry ECG.

Table S3. Genes involved in human atrial fibrillation and related arrhythmias identified by GWAS.

Table S4. Other genes tested by qRT-PCR.

Figure S1. Generation of the *Pitx2* conditional knockout mice.

Figure S2. Microarray intensity value distribution and reproducibility.

Figure S3. Differential expressed genes in each stage.

Figure S4. ChIP-Seq peaks overlay with up-regulated genes from microarray.

Figure S5. Genome browser tracks for additional potential targets of *Pitx2* in adult heart identified by ChIP-Seq.

Supplemental reference

## **Supplemental methods**

### **$\beta$ -Gal staining and Immunostaining**

$\beta$ -Gal staining was done as previously described<sup>1</sup>. Immunostainings were done on frozen sections of adult heart. Samples were incubated in primary antibody at 4°C overnight. After washing in PBS, sections were incubated in the appropriate fluorescent-labeled secondary antibodies, followed by counterstaining with DAPI (Sigma) then mounted in VECTASHIELD H-1000 mounting medium (Vector Laboratories, Inc.). Primary antibodies used were as follows: Rabbit polyclonal anti-Pitx2 (1:100) (Capra Science) and Rabbit anti-  $\beta$ -catenin (1:100) (Cell Signaling). Secondary antibodies used was as follows: Alexa Fluor® 488 goat anti-rabbit IgG (1:1000) (Molecular Probes). Immunofluorescent images were captured on a Leica TCS SP5 confocal microscope, and all functions were controlled via Leica LAS AF software (Leica Microsystems). All manuscript figures were prepared using Adobe Photoshop CS5 (Adobe Systems Inc.) and Microsoft Powerpoint (Microsoft Inc.).

### **Realtime RT-PCR and luciferase assay**

Total RNA was isolated using the miRNeasy mini Kit (QIAGEN), followed by RT-PCR using qScript™ cDNA SuperMix (Quanta Biosciences). Three biological replicates were collected for control and mutant. Real-time thermal cycling was performed using Stepone Plus thermal cycler (Applied Biosystems) with PerfeCTa™ SYBR Green FASTMix™ (Quanta Biosciences). Comparative Ct method was used to quantitate relative gene expressions. Firstly, Ct value of both mutants and controls was normalized to an endogenous housekeeping gene (*GAPDH*). Secondly, each sample was

calibrated to the mean of control Ct value. Lastly, Ct value was transformed to fold change using exponential transformation. Standard deviation of both control and mutant samples were calculated within the groups. Two-sample Wilcoxon test was performed between control and mutant. Sequences of PCR primers are available upon request.

Luciferase reporters were constructed from PGL3 luciferase reporter vector (Promega) and 1-3 kb DNA fragment amplified from Genomic DNA using primers for CHIP-Seq peak regions. PCR was performed using PrimeSTAR HS DNA Polymerase (Takara Biotechnology Co., LTD.). Clonings were done by using Gateway Vector Conversion System (Invitrogen). Sequences for PCR primers are available upon request.

Expression construct for Pitx2c was obtained from Dr. Brad Amendt. 293FT cells were transfected with the reporter construct and Pitx2c expression construct or control construct. Transfection was done by using Lipofectamine 2000 (Invitrogene) per the manufacturer's protocol. Luciferase activities were measured on Infinite M200 Pro multimode microplate reader (TECAN) using Dual-Glo Luciferase Assay System (Promega) per the instruction of the manufacturer. Average luciferase activity are reported with standard deviation. Two-sample Wilcoxon-test was performed using R.

### **R-R interval measurement**

Telemetry ECG data was collected on DSI Telemetric Physiological Monitor System and processed by Dataquest A.R.T. 3.1 software (Data Sciences International). For each mouse, manually select uninterrupted 1 minute ECG interval with uniform maximum R-wave voltage; number of heart beats counted accordingly. R-R intervals were measured in the unit of millisecond. Mean and standard deviation of R-R interval from each mouse

were calculated using R software. Two-tailed, unpaired Student's t-test ( $n > 400$ ) was performed for mean and standard deviation values of R-R interval; no significant difference was detected of mean R-R interval value between controls and mutants ( $p = 0.54$ ); standard deviation of R-R interval from mutant mice were significantly greater than that of control mice ( $p = 0.003$ ).

### **Microarray and ChIP-Seq data processing**

The raw data of microarray was generated using Affymetrix Microarray Suite version 5.0 (MAS 5.0) using Affymetrix default analysis settings and global scaling as a normalization method. The trimmed mean target intensity of each array was arbitrarily set to 100. The value distribution of raw intensity from total 18 samples was graphically viewed in box plots. To show reproducibility across three biological replicates within each group, linear correlation coefficient value  $r$  was measured between each pair of replicates within each groups using R software function *var*.

Differential expressed genes were detected using R bioconductor package 'Limma' version 3.16.8. Briefly, log transformation was performed to the raw intensity values, the normality was checked using histogram and quantile-quantile plot for each condition; Shapiro-Wilk test was performed on randomly selected 300 genes from each array using R shapiro test function, resulted  $p$  value  $> 0.05$  for all 18 individual chips.

Student's t-test was performed to identify differences of expression level between wild type and mutants for each probe. Benjamini & Hochberg false discovery rate method was used for multiple comparison correction. Differentially expressed genes were called using cutoffs  $p$ -value  $\leq 0.05$ ; fold change  $\geq 1.5$  and FDR  $\leq 0.35$ .

We compared differential expressed genes in 3-, 6- and 12-week of age individually. Total 3,323 genes were collectively called as differentially expressed, and were subjected to R package HOPACH to perform unsupervised clustering based on a cosine angle distance matrix. The first level of the hierarchical tree contains 5 clusters, one of which has 2,697 genes with significant higher expression value compared to the other 4 clusters. Gene ontology analysis showed that genes from this cluster are enriched in heart and atrium. Clusters I-V, shown in Fig.2, were clusters on the third level of the tree derived from this highly expressed, heart-related gene group, with a minimum of 30 genes in each cluster. Raw intensity values from individual samples were used to plot in heat map. Relative expression value was calculated using following formula and illustrated in color:

$$\text{Relative expression value} = (\text{Individual expression density} - \text{Mean}) / \text{std.deviation}$$

Over-represented gene ontology terms were identified using GO Elite with its default Z score and permutation methods<sup>2-4</sup>. To calculate Z score, the observed number of genes in the input gene list was subtracted from the expected number of genes associated with a particular biological term and divided by the standard deviation of the observed number. To determine the likelihood of observing the calculated Z score by chance, the permutation analysis was performed. The same number of genes as input gene list was randomly selected from background gene list and calculated Z score. This process was repeated 5000 times for each input gene list. False discovery rate was calculated using Benjamini-Hochberg correction. GO terms were plotted using Z score (Fig.3A). Only terms with FDR < 0.10 were reported.

Ion torrent PGM reads were mapped to the mm9 assembly (NCBI Build 37) using Torrent Suite (2.0.1) aligner Tmap (0.2.3) (Life Technologies). The ChIP-Seq signal was normalized to a 10 million reads total and visualized in the UCSC genome browser. ChIP enriched peaks were identified using Homer <sup>4</sup> by the default setting. Briefly, a fixed peak size was calculated automatically, in our case, the peak size was 162 bp. The program then scanned the entire genome for 162 bp clusters with the highest density of reads. After all clusters have been found, the program compared Pitx2 ChIP-Seq reads against input control reads. The cutoffs for calling the peaks were read number enriched at least 4 fold, FDR threshold 0.001, FDR effective Poisson p-value  $3.7e-8$ , and minimum read number 5. This process produced 11,280 enriched peaks. Nearest genes associated to the enriched peaks were annotated using the annotatePeaks function and de novo motif discovery was performed using the findMotifsGenome function in Homer. Genes associated to ChIP-Seq peaks were overlaid with significantly up-regulated genes in 12-week mutants. The overlaid gene list was analyzed with GO Elite for enriched gene ontology terms. Microarray and ChIP-Seq data are available through the NCBI Gene Expression Omnibus (GEO) data repository under accession GSE50401.

**Table S1. Abnormal R-R intervals in Pitx2 CKO mice.** R-R interval were sampled from unintefrrupted 1 minute ECG tracing of control (*Pitx2 Flox/Flox*) and *Pitx2* CKO (*Pitx2 Flox/Flox MCK-Cre*) mice. Mean and standard deviation of R-R interval from each mouse were listed. Two-sided, unpaired Student's t-test was performed for mean and standard deviation values of R-R interval; no significant difference was detected of mean R-R interval value between controls and mutants ( $p = 0.543$ ); standard deviation of R-R interval from mutant mice were significantly greater than that of control mice ( $p = 0.003$ ).

| Animals | Age        | # of heart beats | R-R interval ( ms ) |         |
|---------|------------|------------------|---------------------|---------|
|         |            |                  | Mean (*)            | SD (**) |
| Ctrl 1  | 2-4 months | 554              | 105                 | 9       |
| Ctrl 2  |            | 392              | 146                 | 10      |
| Ctrl 3  |            | 467              | 123                 | 10      |
| Ctrl 4  |            | 447              | 127                 | 10      |
| Ctrl 5  | 7 months   | 420              | 142                 | 10      |
| CKO 1   | 2-4 months | 488              | 117                 | 30      |
| CKO 2   |            | 408              | 140                 | 24      |
| CKO 3   |            | 420              | 137                 | 21      |
| CKO 4   |            | 485              | 118                 | 18      |
| CKO 5   |            | 505              | 114                 | 16      |
| CKO 5   | 7-8 months | 585              | 98                  | 29      |
| CKO 6   |            | 513              | 113                 | 16      |
| CKO 7   |            | 420              | 137                 | 45      |

ms: millisecond

SD: Standard Deviation

\*  $p = 0.543$

\*\*  $p = 0.003$

**Table S2. Mice tested by telemetry ECG.** The table summarizes genotype, age, number, and phenotype of mice tested by telemetry ECG.

| <b>Genotype</b>         | <b>Age</b> | <b>Animal number</b> | <b>Phenotype</b>                                            |
|-------------------------|------------|----------------------|-------------------------------------------------------------|
| Pitx2 Flox/Flox         | 2-4 months | 4                    | Normal sinus rhythm (4/4)                                   |
| Pitx2 Flox/Flox         | 7-8 months | 1                    | Normal sinus rhythm (1/1)                                   |
| Pitx2 Flox/Flox MCK-Cre | 2-4 months | 5                    | Sinus node dysfunction with impaired atrial conduction(5/5) |
| Pitx2 Flox/Flox MCK-Cre | 7-8 months | 2                    | Sinus node dysfunction with impaired atrial conduction(2/2) |



**Table S3. Genes involved in human atrial fibrillation and related arrhythmias**

**identified by GWAS.** Gene symbol, gene type and heart function involved are shown.

| Gene symbol | Gene type                                   | Heart function involved                                              |
|-------------|---------------------------------------------|----------------------------------------------------------------------|
| Tbx5        | T-box Transcription factor                  | Atrial fibrillation <sup>5</sup> ; PR interval <sup>6-10</sup>       |
| Tbx20       | T-box Transcription factor                  | QRS duration <sup>8</sup>                                            |
| Cav1        | Components of the caveolae plasma membranes | Atrial fibrillation <sup>11</sup> ; PR interval <sup>6, 7, 9</sup>   |
| Zfx3        | Zinc finger homeobox protein                | Atrial fibrillation <sup>11-13</sup>                                 |
| Cacna1d     | Calcium channel voltage dependent           | Atrial fibrillation <sup>8, 14</sup> ; QRS duration <sup>8</sup>     |
| Kcnq1       | potassium voltage-gated channel             | Atrial fibrillation <sup>15, 16</sup> ; QT interval <sup>16-18</sup> |

**Table S4. Other gene tested by qRT-PCR.** Gene symbols and result from the experiments are shown.

| <b>Gene symbol</b> | <b>Alternation in expression level in Pitx2 CKO left atrium</b> |
|--------------------|-----------------------------------------------------------------|
| Kcnn3              | No significant change                                           |
| Nkx2.5             | No significant change                                           |
| Ctnnb1             | No significant change                                           |
| Tbx5               | No significant change                                           |
| Dlg1               | No significant change                                           |
| Cav2               | Decreased                                                       |

**Figure S1. Generation of the *Pitx2* conditional knockout mice.** (A) Strategy for the generation of the *Pitx2* conditional knockout allele. *Pitx2 Flox* allele has two *LoxP* sites flanking exon5, which encodes the N terminus of DNA binding homeodomain. Upon the activation of MCK-Cre, recombination between the two *LoxP* sites results in the deletion of exon 5, thus generate the *Pitx2* conditional knockout allele. (B) Expression of MCK-Cre in the heart. *MCK-Cre* mice were mated to *R26R* mice to generate progenies with the genotype *MCK-Cre R26R* which express  $\beta$ -Galactosidase ( $\beta$ -Gal) in the MCK-Cre expression domain. Hearts of embryos and pups from the mating were collected and stained for  $\beta$ -Gal. Images of whole mount E17.5 *MCK-Cre R26R* embryonic heart and P2 heart are shown. In the E17.5 *MCK-Cre R26R* heart,  $\beta$ -Gal staining was detected in the ventricles and was barely detected in the atria (left panel). In P2 heart,  $\beta$ -Gal staining was detected in the whole heart (right panel). (C) Immunofluorescence staining for *Pitx2* in the postnatal heart cells show expression of *Pitx2* in the nuclei of the control (*Pitx2 Flox/Flox*) heart cells and is nearly lost in *Pitx2 CKO* heart. Nuclei of the heart cells were also labeled by TO-PRO-3 (TOP3). Images show the staining in the left atria of the 3-month-old control (*Pitx2 Flox/Flox*) and *Pitx2 CKO* (*Pitx2 Flox/Flox MCK-Cre*) mice. (D) Real time RT-PCR assay using primers spanning exon 5 of *Pitx2* transcripts shows *Pitx2* expression level decreased over 80% in the left atrium of P1 *Pitx2 CKO* heart. Values and error bars represent mean and standard deviation ( $n = 3$ ).

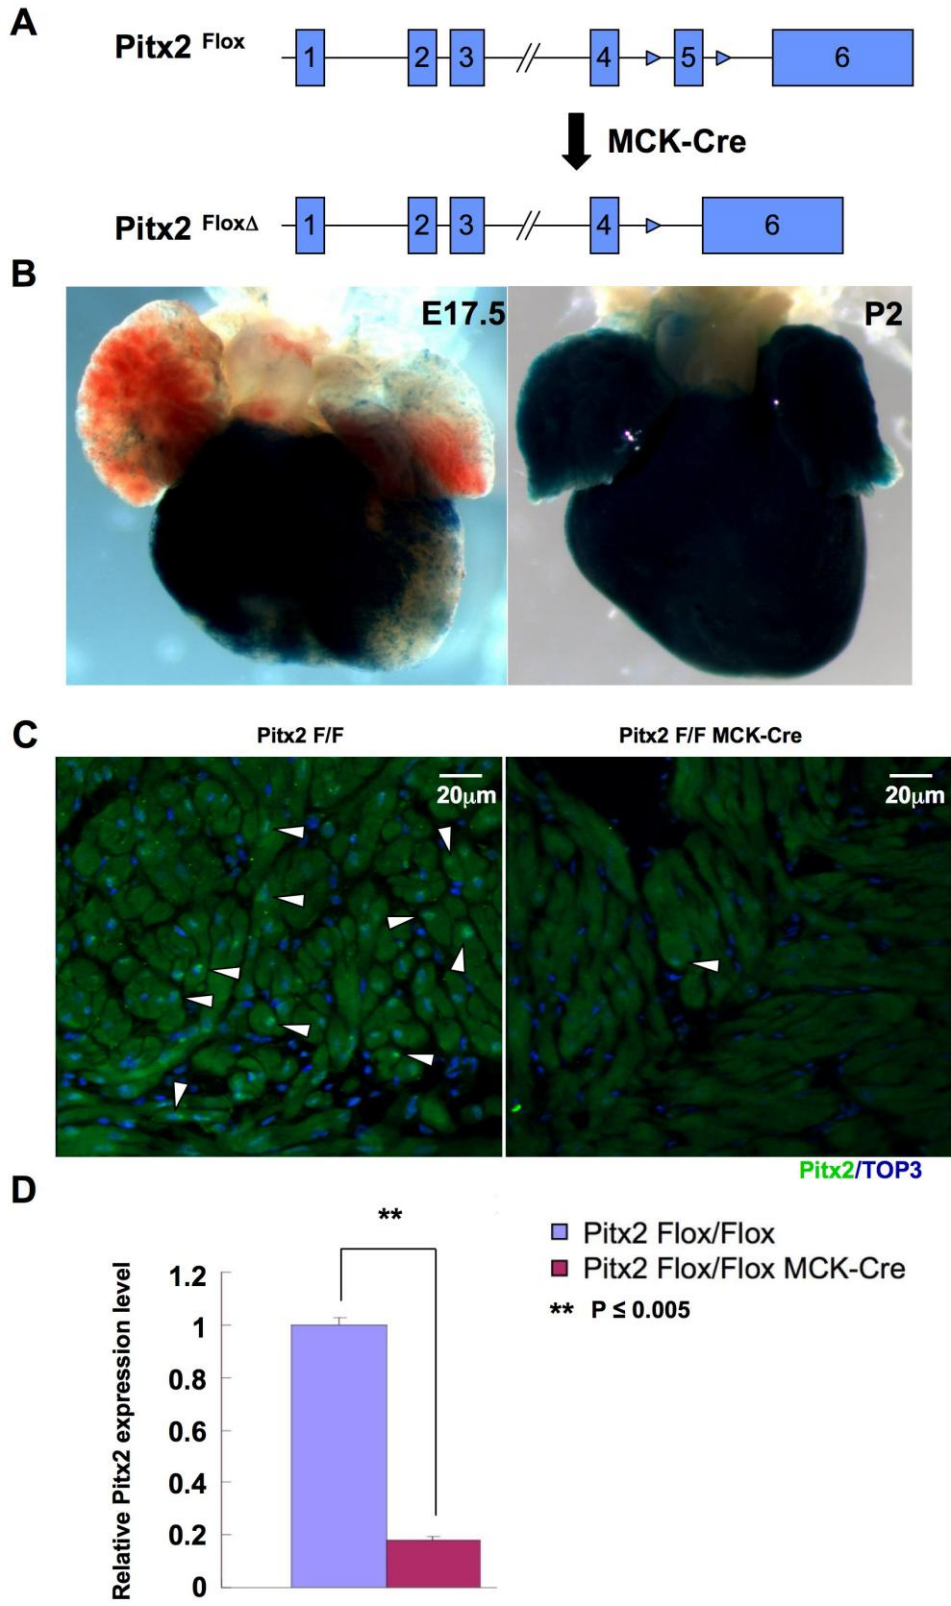

**Figure S2. Microarray intensity value distribution and reproducibility. (A)**

Microarray was performed on *Pitx2* control and mutant hearts collected from 3-, 6- and 12-week-old mice. At each time point, three controls and three mutants were collected as biological replicates. Raw signal values were normalized using a logarithmic method. No significant outlier was observed across the samples. (B) Mean of logarithmic raw signal values of biological replicates was used for comparison between groups. No significant outlier was observed across groups. (C) Reproducibility of microarray raw signal across three biological replicates in each group. Each probe was plotted using raw signal value from one biological replicate as x-axis value, and that from another biological replicate as y-axis value. Total 45,101 points were plotted on each diagram. Linear correlation coefficient was measured, as  $r$  given in each diagram. The blue lines on each diagram indicate the line of best fit.

**A**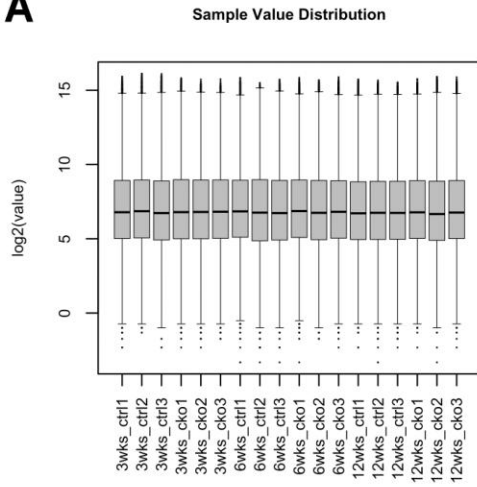**B**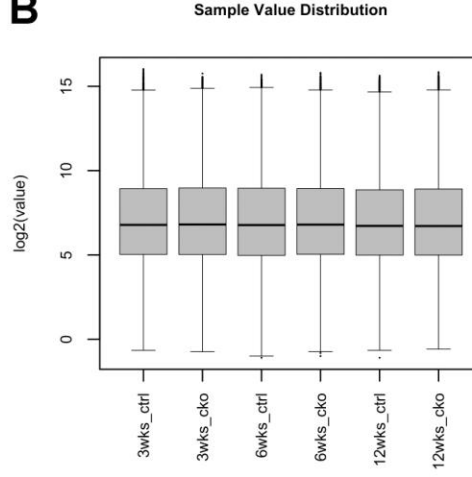**C**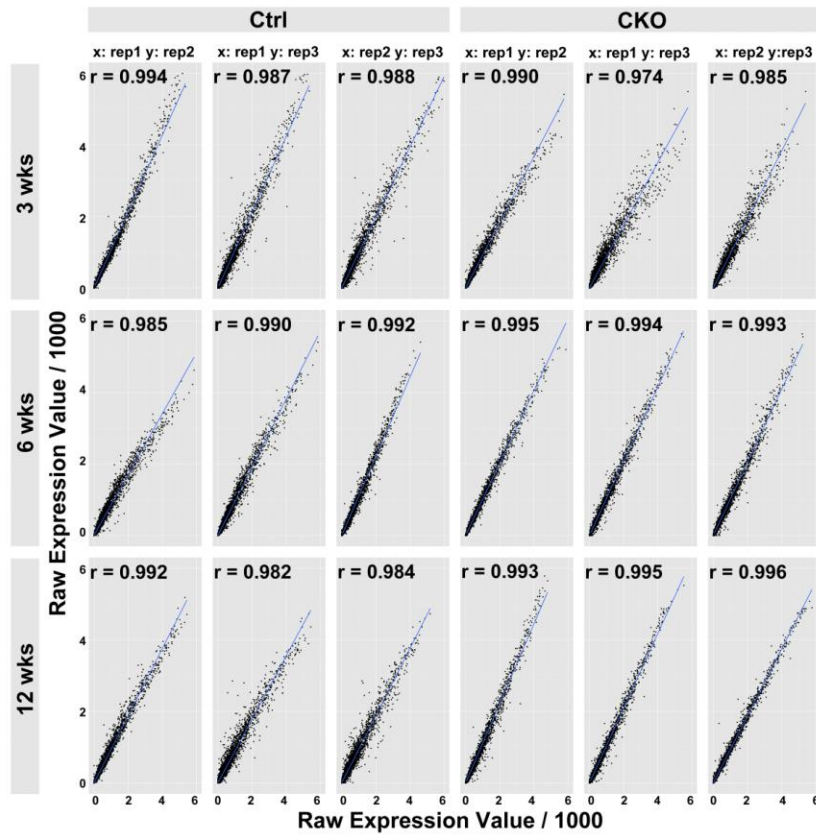

**Figure S3. Differential expressed genes in each stage.** (A-C) *Pitx2* controls and mutants were compared to each other within each stage using linear models. Individual genes were plotted using logarithmic of fold change as x-axis index and  $-\log_{10}$  of  $p$ -value as y-axis index. Total 45,101 points were plotted on each diagram. Differential expressed genes with a fold change of at least 1.5 and  $p$  value  $< 0.05$  were highlighted in blue. The numbers of genes up-regulated or down-regulated in each stage were shown as  $n$ .

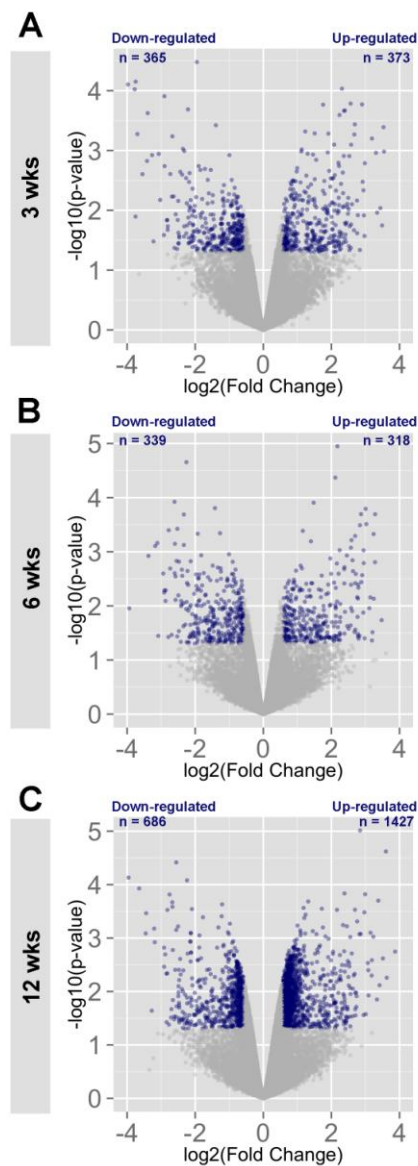

**Figure S4. ChIP-Seq peaks overlay with up-regulated genes from microarray. (A)** Annotation of Pitx2 ChIP-Seq peaks from 12-week-old heart. Total 11,275 peaks were detected. 18.8% of the Pitx2 ChIP-Seq peaks were located in promoter or transcription start sites (TSS) regions; 12.1% in exons; 35.3% in intron, 32.0% in intergenic regions and 0.1% in transcription terminal sites (TTS). (B) The density of Pitx2 motif (GCTGGGATTACA) within ChIP-Seq peaks was shown. The occurrence of Pitx2 motif was close to the center of the peaks. (C) Total 7,983 unique genes were found by annotating closest gene to the ChIP-Seq peaks. 1,427 genes were up-regulated in 12-week-old Pitx2 mutant hearts. Overlaid 653 genes consist of 8.1% genes having ChIP-Seq peaks and 45.7% up-regulated genes in 12-week-old Pitx2 mutants.

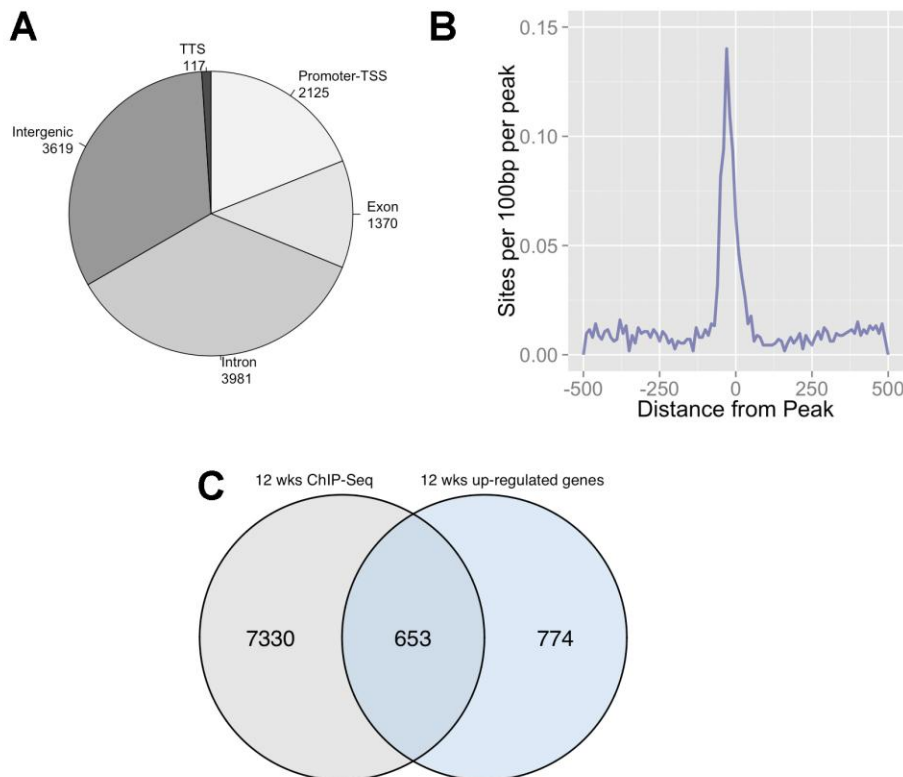



**Figure S5. Genome browser tracks for additional potential targets of Pitx2 in adult heart identified by ChIP-Seq.** Four potential targets of Pitx2 identified by ChIP-Seq by our studies are shown here: Tbx5, Zfh3, Ctnnb1 and Gja1. Peaks from ChIP-Seq and conservation with human genome are shown. Normalized ChIP-Seq tag numbers are shown on the Y-axis.

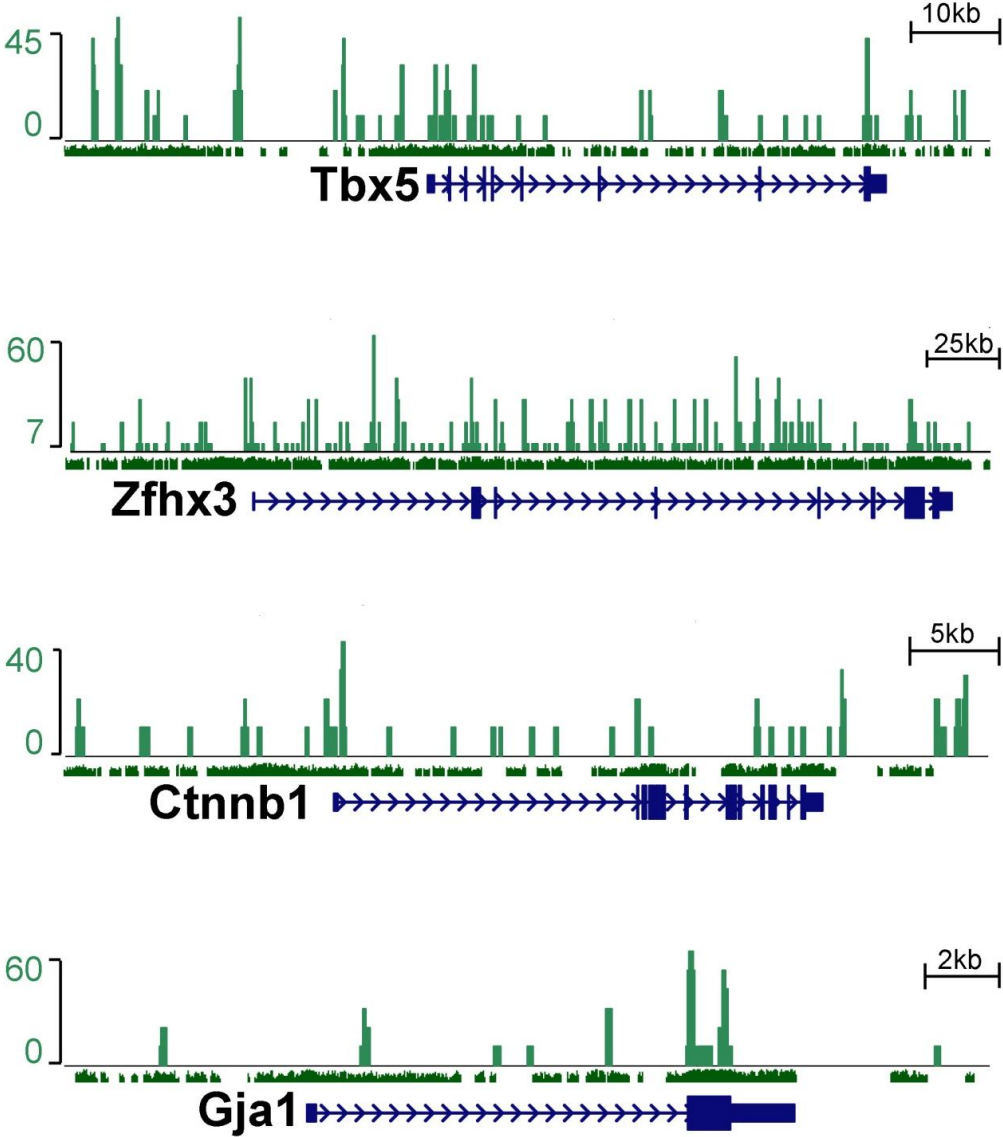

## Supplemental reference

1. Wang J, Klysik E, Sood S, Johnson RL, Wehrens XH, Martin JF. Pitx2 prevents susceptibility to atrial arrhythmias by inhibiting left-sided pacemaker specification. *Proc Natl Acad Sci U S A*. 2010;107:9753-9758.
2. Pollard KS, Dudoit S, Van Der Laan MJ. Multiple testing procedures: R multitest package and applications to genomics. <http://biostats.bepress.com/ucbbiostat/paper164/>. 2004.
3. Zambon AC, Gaj S, Ho I, Hanspers K, Vranizan K, Evelo CT, Conklin BR, Pico AR, Salomonis N. Go-elite: A flexible solution for pathway and ontology over-representation. *Bioinformatics (Oxford, England)*. 2012;28:2209-2210.
4. Heinz S, Benner C, Spann N, Bertolino E, Lin YC, Laslo P, Cheng JX, Murre C, Singh H, Glass CK. Simple combinations of lineage-determining transcription factors prime cis-regulatory elements required for macrophage and b cell identities. *Mol Cell*. 2010;38:576-589.
5. Postma AV, van de Meerakker JB, Mathijssen IB, Barnett P, Christoffels VM, Ilgun A, Lam J, Wilde AA, Lekanne Deprez RH, Moorman AF. A gain-of-function tbx5 mutation is associated with atypical holt-oram syndrome and paroxysmal atrial fibrillation. *Circulation research*. 2008;102:1433-1442.
6. Holm H, Gudbjartsson DF, Arnar DO, Thorleifsson G, Thorgeirsson G, Stefansdottir H, Gudjonsson SA, Jonasdottir A, Mathiesen EB, Njolstad I, Nyrnes A, Wilsgaard T, Hald EM, Hveem K, Stoltenberg C, Lochen ML, Kong A, Thorsteinsdottir U, Stefansson K. Several common variants modulate heart rate, pr interval and qrs duration. *Nature genetics*. 2010;42:117-122.

7. Pfeufer A, van Noord C, Marciante KD, Arking DE, Larson MG, Smith AV, Tarasov KV, Muller M, Sotoodehnia N, Sinner MF, Verwoert GC, Li M, Kao WH, Kottgen A, Coresh J, Bis JC, Psaty BM, Rice K, Rotter JI, Rivadeneira F, Hofman A, Kors JA, Stricker BH, Uitterlinden AG, van Duijn CM, Beckmann BM, Sauter W, Gieger C, Lubitz SA, Newton-Cheh C, Wang TJ, Magnani JW, Schnabel RB, Chung MK, Barnard J, Smith JD, Van Wagoner DR, Vasani RS, Aspelund T, Eiriksdottir G, Harris TB, Launer LJ, Najjar SS, Lakatta E, Schlessinger D, Uda M, Abecasis GR, Muller-Myhsok B, Ehret GB, Boerwinkle E, Chakravarti A, Soliman EZ, Lunetta KL, Perz S, Wichmann HE, Meitinger T, Levy D, Gudnason V, Ellinor PT, Sanna S, Kaab S, Witteman JC, Alonso A, Benjamin EJ, Heckbert SR. Genome-wide association study of PR interval. *Nature genetics*. 2010;42:153-159.
8. Sotoodehnia N, Isaacs A, de Bakker PI, Dorr M, Newton-Cheh C, Nolte IM, van der Harst P, Muller M, Eijgelsheim M, Alonso A, Hicks AA, Padmanabhan S, Hayward C, Smith AV, Polasek O, Giovannone S, Fu J, Magnani JW, Marciante KD, Pfeufer A, Gharib SA, Teumer A, Li M, Bis JC, Rivadeneira F, Aspelund T, Kottgen A, Johnson T, Rice K, Sie MP, Wang YA, Klopp N, Fuchsberger C, Wild SH, Mateo Leach I, Estrada K, Volker U, Wright AF, Asselbergs FW, Qu J, Chakravarti A, Sinner MF, Kors JA, Petersmann A, Harris TB, Soliman EZ, Munroe PB, Psaty BM, Oostra BA, Cupples LA, Perz S, de Boer RA, Uitterlinden AG, Volzke H, Spector TD, Liu FY, Boerwinkle E, Dominiczak AF, Rotter JI, van Herpen G, Levy D, Wichmann HE, van Gilst WH, Witteman JC, Kroemer HK, Kao WH, Heckbert SR, Meitinger T, Hofman A, Campbell H, Folsom AR, van

- Veldhuisen DJ, Schwienbacher C, O'Donnell CJ, Volpato CB, Caulfield MJ, Connell JM, Launer L, Lu X, Franke L, Fehrmann RS, te Meerman G, Groen HJ, Weersma RK, van den Berg LH, Wijmenga C, Ophoff RA, Navis G, Rudan I, Snieder H, Wilson JF, Pramstaller PP, Siscovick DS, Wang TJ, Gudnason V, van Duijn CM, Felix SB, Fishman GI, Jamshidi Y, Stricker BH, Samani NJ, Kaab S, Arking DE. Common variants in 22 loci are associated with qrs duration and cardiac ventricular conduction. *Nature genetics*. 2010;42:1068-1076.
9. Butler AM, Yin X, Evans DS, Nalls MA, Smith EN, Tanaka T, Li G, Buxbaum SG, Whitsel EA, Alonso A, Arking DE, Benjamin EJ, Berenson GS, Bis JC, Chen W, Deo R, Ellinor PT, Heckbert SR, Heiss G, Hsueh WC, Keating BJ, Kerr KF, Li Y, Limacher MC, Liu Y, Lubitz SA, Marciante KD, Mehra R, Meng YA, Newman AB, Newton-Cheh C, North KE, Palmer CD, Psaty BM, Quibrera PM, Redline S, Reiner AP, Rotter JI, Schnabel RB, Schork NJ, Singleton AB, Smith JG, Soliman EZ, Srinivasan SR, Zhang ZM, Zonderman AB, Ferrucci L, Murray SS, Evans MK, Sotoodehnia N, Magnani JW, Avery CL. Novel loci associated with pr interval in a genome-wide association study of 10 african american cohorts. *Circulation. Cardiovascular genetics*. 2012;5:639-646.
10. Smith JG, Magnani JW, Palmer C, Meng YA, Soliman EZ, Musani SK, Kerr KF, Schnabel RB, Lubitz SA, Sotoodehnia N, Redline S, Pfeufer A, Muller M, Evans DS, Nalls MA, Liu Y, Newman AB, Zonderman AB, Evans MK, Deo R, Ellinor PT, Paltoo DN, Newton-Cheh C, Benjamin EJ, Mehra R, Alonso A, Heckbert SR, Fox ER. Genome-wide association studies of the pr interval in african americans. *PLoS Genet*. 2011;7:e1001304.

11. Ellinor PT, Lunetta KL, Albert CM, Glazer NL, Ritchie MD, Smith AV, Arking DE, Muller-Nurasyid M, Krijthe BP, Lubitz SA, Bis JC, Chung MK, Dorr M, Ozaki K, Roberts JD, Smith JG, Pfeufer A, Sinner MF, Lohman K, Ding J, Smith NL, Smith JD, Rienstra M, Rice KM, Van Wagoner DR, Magnani JW, Wakili R, Clauss S, Rotter JI, Steinbeck G, Launer LJ, Davies RW, Borkovich M, Harris TB, Lin H, Volker U, Volzke H, Milan DJ, Hofman A, Boerwinkle E, Chen LY, Soliman EZ, Voight BF, Li G, Chakravarti A, Kubo M, Tedrow UB, Rose LM, Ridker PM, Conen D, Tsunoda T, Furukawa T, Sotoodehnia N, Xu S, Kamatani N, Levy D, Nakamura Y, Parvez B, Mahida S, Furie KL, Rosand J, Muhammad R, Psaty BM, Meitinger T, Perz S, Wichmann HE, Witteman JC, Kao WH, Kathiresan S, Roden DM, Uitterlinden AG, Rivadeneira F, McKnight B, Sjogren M, Newman AB, Liu Y, Gollob MH, Melander O, Tanaka T, Stricker BH, Felix SB, Alonso A, Darbar D, Barnard J, Chasman DI, Heckbert SR, Benjamin EJ, Gudnason V, Kaab S. Meta-analysis identifies six new susceptibility loci for atrial fibrillation. *Nature genetics*. 2012;44:670-675.
12. Benjamin EJ, Rice KM, Arking DE, Pfeufer A, van Noord C, Smith AV, Schnabel RB, Bis JC, Boerwinkle E, Sinner MF, Dehghan A, Lubitz SA, D'Agostino RB, Sr., Lumley T, Ehret GB, Heeringa J, Aspelund T, Newton-Cheh C, Larson MG, Marcicante KD, Soliman EZ, Rivadeneira F, Wang TJ, Eiriksdottir G, Levy D, Psaty BM, Li M, Chamberlain AM, Hofman A, Vasan RS, Harris TB, Rotter JI, Kao WH, Agarwal SK, Stricker BH, Wang K, Launer LJ, Smith NL, Chakravarti A, Uitterlinden AG, Wolf PA, Sotoodehnia N, Kottgen A, van Duijn CM, Meitinger T, Mueller M, Perz S, Steinbeck G, Wichmann HE, Lunetta KL, Heckbert SR,

- Gudnason V, Alonso A, Kaab S, Ellinor PT, Witteman JC. Variants in *zfhx3* are associated with atrial fibrillation in individuals of european ancestry. *Nature genetics*. 2009;41:879-881.
13. Gudbjartsson DF, Holm H, Gretarsdottir S, Thorleifsson G, Walters GB, Thorgeirsson G, Gulcher J, Mathiesen EB, Njolstad I, Nyrnes A, Wilsgaard T, Hald EM, Hveem K, Stoltenberg C, Kucera G, Stubblefield T, Carter S, Roden D, Ng MC, Baum L, So WY, Wong KS, Chan JC, Gieger C, Wichmann HE, Gschwendtner A, Dichgans M, Kuhlenbaumer G, Berger K, Ringelstein EB, Bevan S, Markus HS, Kostulas K, Hillert J, Sveinbjornsdottir S, Valdimarsson EM, Lochen ML, Ma RC, Darbar D, Kong A, Arnar DO, Thorsteinsdottir U, Stefansson K. A sequence variant in *zfhx3* on 16q22 associates with atrial fibrillation and ischemic stroke. *Nature genetics*. 2009;41:876-878.
14. Zhang Z, He Y, Tuteja D, Xu D, Timofeyev V, Zhang Q, Glatter KA, Xu Y, Shin HS, Low R, Chiamvimonvat N. Functional roles of *cav1.3(alpha1d)* calcium channels in atria: Insights gained from gene-targeted null mutant mice. *Circulation*. 2005;112:1936-1944.
15. Chen YH, Xu SJ, Bendahhou S, Wang XL, Wang Y, Xu WY, Jin HW, Sun H, Su XY, Zhuang QN, Yang YQ, Li YB, Liu Y, Xu HJ, Li XF, Ma N, Mou CP, Chen Z, Barhanin J, Huang W. *Kcnq1* gain-of-function mutation in familial atrial fibrillation. *Science*. 2003;299:251-254.
16. Newton-Cheh C, Eijgelsheim M, Rice KM, de Bakker PI, Yin X, Estrada K, Bis JC, Marcianti K, Rivadeneira F, Noseworthy PA, Sotoodehnia N, Smith NL, Rotter JI, Kors JA, Witteman JC, Hofman A, Heckbert SR, O'Donnell CJ,

- Uitterlinden AG, Psaty BM, Lumley T, Larson MG, Stricker BH. Common variants at ten loci influence qt interval duration in the qtgen study. *Nature genetics*. 2009;41:399-406.
17. Pfeufer A, Sanna S, Arking DE, Muller M, Gateva V, Fuchsberger C, Ehret GB, Orru M, Pattaro C, Kottgen A, Perz S, Usala G, Barbalic M, Li M, Putz B, Scuteri A, Prineas RJ, Sinner MF, Gieger C, Najjar SS, Kao WH, Muhleisen TW, Dei M, Hapelle C, Mohlenkamp S, Crisponi L, Erbel R, Jockel KH, Naitza S, Steinbeck G, Marroni F, Hicks AA, Lakatta E, Muller-Myhsok B, Pramstaller PP, Wichmann HE, Schlessinger D, Boerwinkle E, Meitinger T, Uda M, Coresh J, Kaab S, Abecasis GR, Chakravarti A. Common variants at ten loci modulate the qt interval duration in the qtsd study. *Nature genetics*. 2009;41:407-414.
18. Smith JG, Avery CL, Evans DS, Nalls MA, Meng YA, Smith EN, Palmer C, Tanaka T, Mehra R, Butler AM, Young T, Buxbaum SG, Kerr KF, Berenson GS, Schnabel RB, Li G, Ellinor PT, Magnani JW, Chen W, Bis JC, Curb JD, Hsueh WC, Rotter JI, Liu Y, Newman AB, Limacher MC, North KE, Reiner AP, Quibrera PM, Schork NJ, Singleton AB, Psaty BM, Soliman EZ, Solomon AJ, Srinivasan SR, Alonso A, Wallace R, Redline S, Zhang ZM, Post WS, Zonderman AB, Taylor HA, Murray SS, Ferrucci L, Arking DE, Evans MK, Fox ER, Sotoodehnia N, Heckbert SR, Whitsel EA, Newton-Cheh C. Impact of ancestry and common genetic variants on qt interval in african americans. *Circulation. Cardiovascular genetics*. 2012;5:647-655.
